# Supplementary material for: Clean synthesis of acetaldehyde oxime through ammoximation on titanosilicate catalysts
Source: Royal Society of Chemistry journal article supplement (doi:10.1039/c3cy00471f), 2013-01-01

**Clean synthesis of acetaldehyde oxime through ammoximation on titanosilicate  
catalysts**

Jianghong Ding, Le Xu, Yejun Yu, Haihong Wu,\* Shijie Huang, Yulin Yang, Jing Wu,

Peng Wu\*

*Shanghai Key Laboratory of Green Chemistry and Chemical Processes, Department  
of Chemistry, East China Normal University, Shanghai 200062, China*

*E-mail : [hhuwu@chem.ecnu.edu.cn](mailto:hhuwu@chem.ecnu.edu.cn) (H. Wu), [pwu@chem.ecnu.edu.cn](mailto:pwu@chem.ecnu.edu.cn) (P. Wu), Fax :*

*+86-21 62232292*

**Fig. S1.** The  $^1\text{H}$  NMR (a) and  $^{13}\text{C}$  NMR (b) for AAO. For *trans*-AAO,  $^1\text{H}$  NMR (400 MHz,  $\text{CDCl}_3$ ):  $\delta$  9.18 (s, 1H), 7.45 (q,  $J = 6$  Hz, 1H), 1.85 (d,  $J = 6$  Hz, 3H);  $^{13}\text{C}$  NMR (100 MHz,  $\text{CDCl}_3$ ): 148.01, 14.92. For *cis*-AAO,  $^1\text{H}$  NMR (400 MHz,  $\text{CDCl}_3$ ):  $\delta$  9.59 (s, 1H), 6.83 (q,  $J = 5.6$  Hz, 1H), 1.87 (d,  $J = 5.6$  Hz, 3H);  $^{13}\text{C}$  NMR (100 MHz,  $\text{CDCl}_3$ ): 147.68, 11.00.

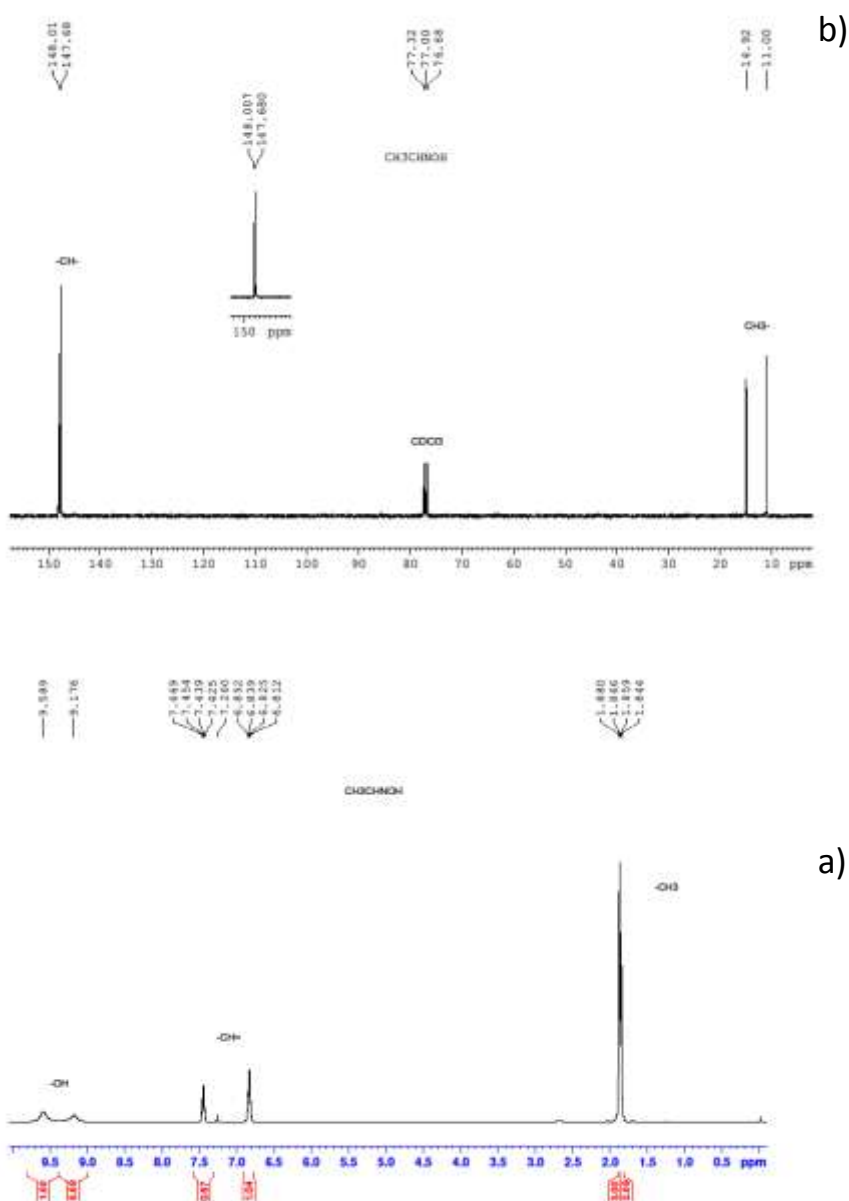

**Fig. S2.**  $^{29}\text{Si}$  MAS NMR spectra (red) and fitting results (blue) of Ti-MWW (a), TS-1 (b) and Ti-MOR (c).

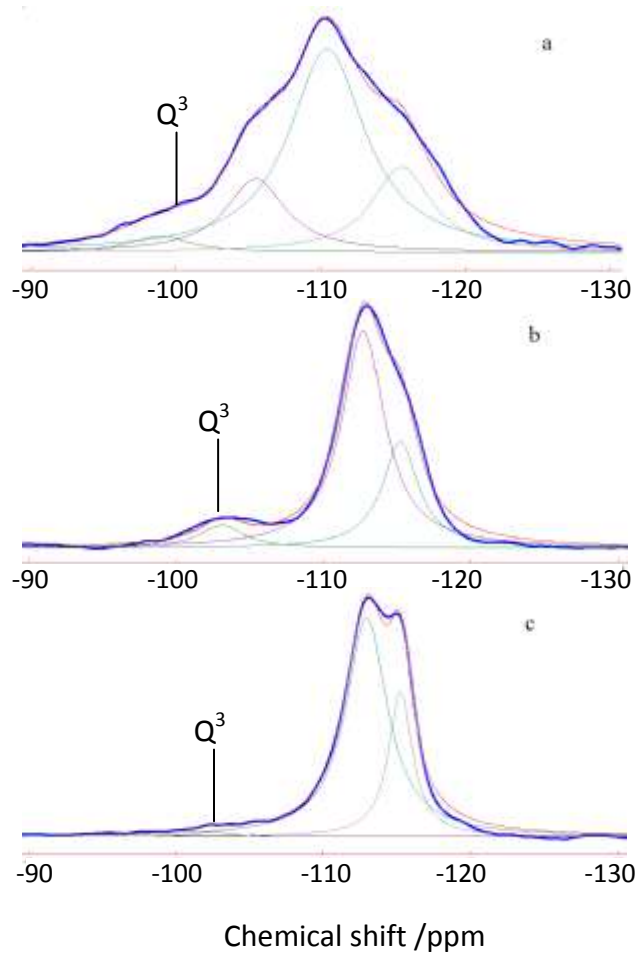

The  $\text{Q}^3$  group accounts for 3.68 %, 6.98 % and 1.34 % of total silicon population for Ti-MWW, TS-1 and Ti-MOR, respectively. This indicates that Ti-MOR was the most hydrophobic.

**Fig. S3.** The TG profiles of Ti-MOR (a), Ti-MWW (b) and TS-1 (c).

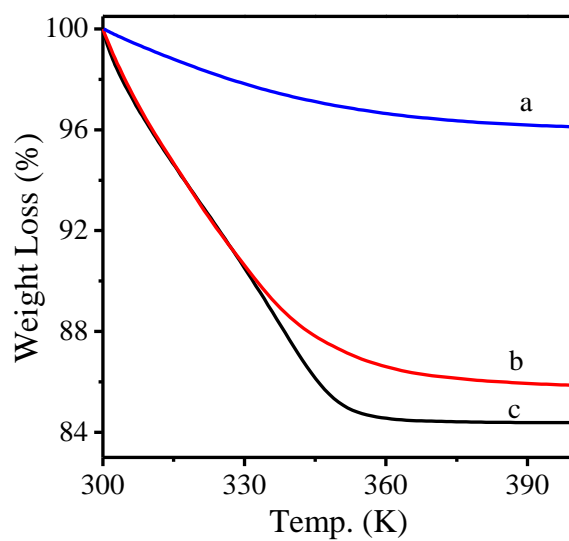

The amount of adsorbed water determined by thermogravimetry was 4 % for Ti-MOR, 14 % for Ti-MWW and 16 % for TS-1 (c). The results were in agreement with  $^{29}\text{Si}$  NMR investigation, verifying that Ti-MOR was more hydrophobic than TS-1 and Ti-MWW.

**Fig. S4.** IR spectra of Ti-MOR samples prepared by  $\text{TiCl}_4$  treatment at 673 K for 0.5 h

(a), 1 h (b), 2 h (c), 3 h (d), and 4 h (e).

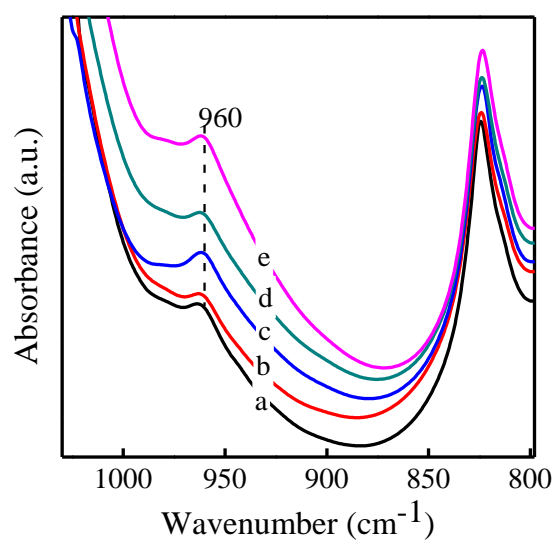

**Fig. S5** The AA conversion and oxime selectivity of the ammoximation performed on regenerated Ti-MOR. Ammoximation conditions: all substrates were added at once; others, see Table 2 except for that the reaction scale was enlarged by twenty times. The used catalyst was regenerated by acetone washing, drying at 393 K for 5 h, and further calcination at 773 K for 5 h.

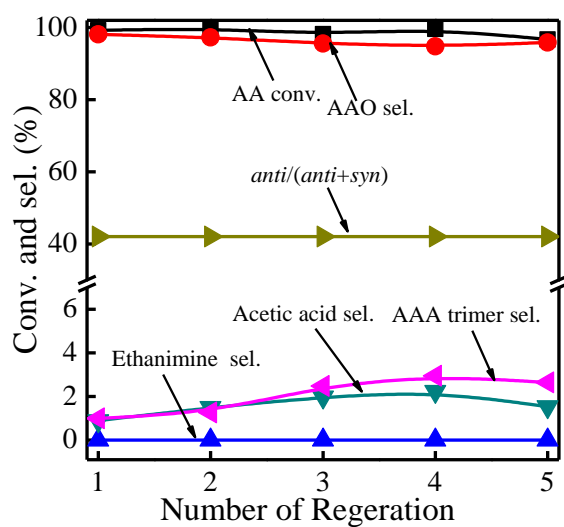

Supplement: c3cy00471f.pdf [file c3cy00471f.pdf]
